# Supplementary material for: A Comparison of Patient-Reported Outcomes Following Consent for Genetic Testing Using an Oncologist- or Genetic Counselor-Mediated Model of Care
Source: MDPI journal article supplement (doi:10.3390/curroncol28020138), 2021-04-08
Supplement: s1 [file s1]

**Table S1.** Univariable analysis of perceived risk, patient experience & understanding, and knowledge.

| Covariate               | Experience & Understanding |         | Perceived Risk     |         | Knowledge             |         |
|-------------------------|----------------------------|---------|--------------------|---------|-----------------------|---------|
|                         | $\beta$ (95% CI)           | p-value | $\beta$ (95% CI)   | p-value | $\beta$ (95% CI)      | p-value |
| <b>Group</b>            |                            | <0.001  |                    | 0.45    |                       | 0.009   |
| GMT                     | Reference                  |         | Reference          |         | Reference             |         |
| OMT                     | -1.73 (-2.44, -1.01)       |         | -4.6(-16.41, 7.21) |         | -1.03 (-1.79, -0.26)  |         |
| <b>Diagnosis</b>        |                            | 0.84    |                    | 0.42    |                       | 0.39    |
| Breast                  | Reference                  |         | Reference          |         | Reference             |         |
| Ovarian                 | 0.09(-0.74, 0.92)          |         | 5.15(-7.46, 17.77) |         | -0.36 (-1.19, 0.47)   |         |
| <b>Age at diagnosis</b> |                            | 0.28    |                    | 0.93    |                       | 0.72    |
|                         | -0.02(-0.05, 0.01)         |         | -0.02(-0.54, 0.5)  |         | -0.006 (-0.004, 0.03) |         |
| <b>Family History</b>   |                            | 0.39    |                    | <0.001  |                       | 0.92    |
| No                      | Reference                  |         | Reference          |         | Reference             |         |
| Yes                     | -0.34(-1.11, 0.43)         |         | 20.31(9.13, 31.48) |         | -0.04 (-0.81, 0.73)   |         |

Total sample size of n=120

Table S2. Univariable analysis of domains of the PAHC tool.

| Covariate               | Hereditary Pre-disposition |                 | Practical & Social Issues |                 | Family Issues        |                 | Living with Cancer   |                 | General Emotions    |                 | Child-related Issues     |                 | Any                  |                 |
|-------------------------|----------------------------|-----------------|---------------------------|-----------------|----------------------|-----------------|----------------------|-----------------|---------------------|-----------------|--------------------------|-----------------|----------------------|-----------------|
|                         | $\beta$<br>(95% CI)        | <i>p</i> -value | $\beta$<br>(95% CI)       | <i>p</i> -value | $\beta$ (95% CI)     | <i>p</i> -value | $\beta$<br>(95% CI)  | <i>p</i> -value | $\beta$<br>(95% CI) | <i>p</i> -value | $\beta$ (95% CI)         | <i>p</i> -value | $\beta$ (95% CI)     | <i>p</i> -value |
| <b>Group</b>            |                            | 0.005           |                           | 0.14            |                      | 0.17            |                      | 0.1             |                     | 0.008           |                          | 0.33            |                      | 0.1             |
| GMT                     | Reference                  |                 | Reference                 |                 | Reference            |                 | Reference            |                 | Reference           |                 | Reference                |                 | Reference            |                 |
| OMT                     | 0.31<br>(0.14, 0.71)       |                 | -0.12<br>(-0.28, 0.04)    |                 | 0.23<br>(0.03, 1.91) |                 | 2.29<br>(0.85, 6.18) |                 | 2.94<br>(1.33,6.47) |                 | 0.11<br>(-0.11, 0.32)    |                 | 2.61<br>(0.82, 8.32) |                 |
| <b>Diagnosis</b>        |                            | 0.92            |                           | 0.17            |                      | 0.7             |                      | 0.55            |                     | 0.37            |                          | 0.41            |                      | 0.66            |
| Breast                  | Reference                  |                 | Reference                 |                 | Reference            |                 | Reference            |                 | Reference           |                 | Reference                |                 | Reference            |                 |
| Ovarian                 | 1.04<br>(0.47, 2.34)       |                 | 0.12<br>(-0.05, 0.29)     |                 | 0.75<br>(0.18, 3.19) |                 | 1.32<br>(0.53, 3.32) |                 | 0.69<br>(0.31,1.55) |                 | 0.1<br>(-0.14,0.33)      |                 | 0.78<br>(0.262,3.4)  |                 |
| <b>Age at diagnosis</b> |                            | 0.79            |                           | 0.1             |                      | 0.08            |                      | 0.98            |                     | 0.06            |                          | 0.07            |                      | 0.05            |
|                         | 1.00<br>(0.96, 1.03)       |                 | 0.97<br>(0.93, 1.01)      |                 | 0.95<br>(0.89, 1.01) |                 | 0.98<br>(0.94, 1.02) |                 | 0.97<br>(0.94,1.0)  |                 | -0.009<br>(-0.02, 9e-03) |                 | 0.96<br>(0.91, 1.0)  |                 |
| <b>Family History</b>   |                            | 0.65            |                           | 0.14            |                      | 0.77            |                      | 0.85            |                     | 0.36            |                          | 0.59            |                      | 0.31            |
| No                      | Reference                  |                 | Reference                 |                 | Reference            |                 | Reference            |                 | Reference           |                 | Reference                |                 | Reference            |                 |
| Yes                     | 0.84<br>(0.4, 1.77)        |                 | -0.12<br>(-0.28, 0.04)    |                 | 1.24<br>(0.29, 5.21) |                 | 1.08<br>(0.45, 2.59) |                 | 0.7<br>(0.33,1.48)  |                 | -0.06<br>(0.28, 0.16)    |                 | 1.64<br>(0.63, 4.23) |                 |

Total sample size of n=120

**Table S3.** Multivariable analysis for Select Domains of the PAHC tool.

| <b>Covariate</b>                            | <b>OR</b> | <b>95% CI</b> | <b><i>p</i>-value</b> |
|---------------------------------------------|-----------|---------------|-----------------------|
| <b>PRACTICAL &amp; SOCIAL ISSUES DOMAIN</b> |           |               |                       |
| <b>Group</b>                                |           |               | 0.08                  |
| GMT                                         | Reference |               |                       |
| OMT                                         | 0.39      | 0.13, 1.12    |                       |
| <b>Diagnosis</b>                            |           |               | <b>0.04</b>           |
| Breast                                      | Reference |               |                       |
| Ovarian                                     | 3.71      | 1.04, 13.25   |                       |
| <b>Age at diagnosis</b>                     | 0.94      | 0.9, 0.99     | <b>0.01</b>           |
| <b>Family history</b>                       |           |               | 0.26                  |
| No                                          | Reference |               |                       |
| Yes                                         | 0.59      | 0.24, 1.48    |                       |
| <b>FAMILY ISSUES DOMAIN</b>                 |           |               |                       |
| <b>Group</b>                                |           |               | 0.08                  |
| GMT                                         | Reference |               |                       |
| OMT                                         | 0.91      | 0.83, 1.01    |                       |
| <b>Age at diagnosis</b>                     | 0.997     | 0.995, 0.999  | <b>0.04</b>           |
| <b>GENERAL EMOTIONS DOMAIN</b>              |           |               |                       |
| <b>Group</b>                                |           |               | <b>0.01</b>           |
| GMT                                         | Reference |               |                       |
| OMT                                         | 1.27      | 1.05, 1.53    |                       |
| <b>Age at diagnosis</b>                     | 0.99      | 0.99, 1.0     | 0.11                  |
| <b>ANY DOMAIN</b>                           |           |               |                       |
| <b>Group</b>                                |           |               | 0.19                  |
| GMT                                         | Reference |               |                       |
| OMT                                         | 1.1       | 0.95, 1.27    |                       |
| <b>Age at diagnosis</b>                     | 0.99      | 0.99, 1.0     | 0.07                  |

Total sample size of n=120

**Table S4.** Survey 2 Participant Demographics and Survey Responses.

| <b>Covariate</b>                                             | <b>Full Sample<br/>(n = 89)</b> | <b>GMT<br/>(n = 60)</b> | <b>OMT<br/>(n = 29)</b> | <b>p-value</b> |
|--------------------------------------------------------------|---------------------------------|-------------------------|-------------------------|----------------|
| <b>Marital Status<sup>a</sup> (%)</b>                        |                                 |                         |                         | 0.67           |
| In a Relationship                                            | 6 (6.8)                         | 5 (8.5)                 | 1 (3.5)                 |                |
| Married/Common-Law                                           | 52(59.1)                        | 33 (55.9)               | 19 (65.5)               |                |
| Single/Widowed                                               | 30 (34.1)                       | 21 (35.6)               | 9 (31.0)                |                |
| <b>Education Level<sup>a</sup> (%)</b>                       |                                 |                         |                         | 0.97           |
| Elementary/Middle S                                          | 3 (3.4)                         | 1 (1.7)                 | 2 (6.9)                 |                |
| High School                                                  | 12 (13.6)                       | 8 (13.6)                | 4 (13.8)                |                |
| Certificate Program                                          | 6 (6.8)                         | 5 (8.5)                 | 1 (3.4)                 |                |
| College/University                                           | 46 (52.3)                       | 32 (54.2)               | 14 (48.3)               |                |
| Post-Graduate                                                | 21 (23.9)                       | 13 (22.0)               | 8 (27.6)                |                |
| <b>Diagnosis (%)</b>                                         |                                 |                         |                         | 0.94           |
| Breast                                                       | 25 (28.1)                       | 17 (28.3)               | 8 (27.6)                |                |
| Ovarian                                                      | 64 (71.9)                       | 43 (71.7)               | 21 (72.4)               |                |
| <b>Age at diagnosis</b>                                      |                                 |                         |                         | 0.35           |
| Mean (sd)                                                    | 57.8 (11.2)                     | 58.7 (10.6)             | 55.9 (12.0)             |                |
| Median (Min,Max)                                             | 57 (24,78)                      | 57.5 (33, 78)           | 56. (24,78)             |                |
| <b>Family history of BR/OV cancer (%)</b>                    |                                 |                         |                         | 0.72           |
| No                                                           | 33 (37.1)                       | 23 (38.3)               | 10 (34.5)               |                |
| Yes                                                          | 56 (62.9)                       | 37 (61.7)               | 19 (65.5)               |                |
| <b>Ethnicity</b>                                             |                                 |                         |                         | 0.07           |
| African                                                      | 1 (1.0)                         | 1 (1.7)                 | 0 (0)                   |                |
| Ashkenazi Jewish                                             | 7 (7.9)                         | 6 (10.0)                | 1 (3.4)                 |                |
| Asian                                                        | 8 (9.0)                         | 7 (11.6)                | 1 (3.4)                 |                |
| Caucasian                                                    | 59 (66.2)                       | 36 (60)                 | 23 (79.6)               |                |
| East Indian                                                  | 4 (4.5)                         | 3 (5.0)                 | 1 (3.4)                 |                |
| Hispanic                                                     | 2 (2.2)                         | 1 (1.7)                 | 1 (3.4)                 |                |
| Middle Eastern                                               | 3 (3.5)                         | 2 (3.3)                 | 1 (3.4)                 |                |
| Mixed                                                        | 1 (1.1)                         | 1 (1.7)                 | 0 (0)                   |                |
| West Indies                                                  | 2 (2.2)                         | 1 (1.7)                 | 1 (3.4)                 |                |
| Missing/Unknown                                              | 2 (2.2)                         | 2 (3.3)                 | 0 (0)                   |                |
| <b>Knowledge Score</b>                                       |                                 |                         |                         | 0.34           |
| Median (Min,Max)                                             | 8 (2,11)                        | 9 (2,11)                | 8 (3,11)                |                |
| Mean (sd)                                                    | 8.1 (2.0)                       | 8.2 (2.0)               | 7.9 (2.0)               |                |
| <b>MICRA Total Score</b>                                     |                                 |                         |                         | 0.53           |
| Median (Min,Max)                                             | 15 (0,75)                       | 15 (0,71)               | 16 (0,75)               |                |
| Mean (sd)                                                    | 18 (15)                         | 16.9 (13.6)             | 20.3 (17.6)             |                |
| <b>Distress subscale</b>                                     |                                 |                         |                         | 0.58           |
| Median (Min,Max)                                             | 0 (0,30)                        | 0 (0,22)                | 0 (0,30)                |                |
| Mean (sd)                                                    | 2.9 (5.7)                       | 2.3 (4.5)               | 4.1 (7.5)               |                |
| <b>Uncertainty subscale</b>                                  |                                 |                         |                         | 0.85           |
| Median (Min,Max)                                             | 6 (0,35)                        | 6 (0,35)                | 6 (0,34)                |                |
| Mean (sd)                                                    | 8.9 (8.6)                       | 8.4 (7.8)               | 9.9 (10.1)              |                |
| <b>Positive Experience subscale</b>                          |                                 |                         |                         | 0.51           |
| Median (Min,Max)                                             | 15 (0,20)                       | 16 (0,20)               | 13 (5,20)               |                |
| Mean (sd)                                                    | 14.1 (5.5)                      | 14.3 (5.6)              | 13.7 (5.3)              |                |
| <b>Correct recall of genetic test result<sup>b</sup> (%)</b> | 86 (97.7)                       | 59 (98.3)               | 27 (96.4)               | 0.54           |
| <b>Discussed result with a relative</b>                      | 84 (94.4)                       | 57 (95.0)               | 27 (93.1)               | 0.66           |

<sup>a</sup> Response missing for 1 GMT participant; <sup>b</sup> Response missing for 1 OMT participant

**Table S5.** Multivariable analysis for changes in knowledge scores.

| Covariate               | $\beta$   | 95% CI       | <i>p</i> -value |
|-------------------------|-----------|--------------|-----------------|
| <b>Group</b>            |           |              | <b>0.035</b>    |
| GMT                     | Reference |              |                 |
| OMT                     | 0.95      | 0.06, 1.83   |                 |
| <b>Diagnosis</b>        |           |              | 0.57            |
| Breast                  | Reference |              |                 |
| Ovarian                 | -0.27     | -1.21, 0.67  |                 |
| <b>Age at diagnosis</b> | -0.03     | -0.07, 0.008 | 0.12            |
| <b>Family history</b>   |           |              | 0.85            |
| No                      | Reference |              |                 |
| Yes                     | 0.008     | -0.79, 0.96  |                 |

Total sample size of  $n = 89$

**Table S6.** Univariable analysis of MICRA questionnaire.

| Covariate               | Total                 |                 | Distress               |                 | Uncertainty            |                 | Positive Experience     |                 |
|-------------------------|-----------------------|-----------------|------------------------|-----------------|------------------------|-----------------|-------------------------|-----------------|
|                         | $\beta$<br>(95% CI)   | <i>p</i> -value | $\beta$<br>(95% CI)    | <i>p</i> -value | $\beta$<br>(95% CI)    | <i>p</i> -value | $\beta$<br>(95% CI)     | <i>p</i> -value |
| <b>Group</b>            |                       | 0.33            |                        | 0.15            |                        | 0.39            |                         | 0.59            |
| GMT                     | Reference             |                 | Reference              |                 | Reference              |                 | Reference               |                 |
| OMT                     | 3.33<br>(-3.33, 9.99) |                 | 1.82<br>(-0.68, 4.32)  |                 | 1.67<br>(-2.14, 5.47)  |                 | -0.66<br>(-3.09, 1.77)  |                 |
| <b>Diagnosis</b>        |                       | 0.71            |                        | 0.74            |                        | 0.61            |                         | 0.45            |
| Breast                  | Reference             |                 | Reference              |                 | Reference              |                 | Reference               |                 |
| Ovarian                 | 1.33<br>(-5.65, 8.3)  |                 | 0.44<br>(-2.19, 3.07)  |                 | -1.04<br>(-5.02, 2.94) |                 | -0.98<br>(-3.51, 1.55)  |                 |
| <b>Age at diagnosis</b> |                       | 0.75            |                        | 0.96            |                        | 0.81            |                         | 0.29            |
|                         | 0.05<br>(-0.23, 0.33) |                 | -0.003<br>(-0.11, 0.1) |                 | -0.02<br>(-0.18, 0.14) |                 | -0.05<br>(-0.16, 1.05)  |                 |
| <b>Family History</b>   |                       | 0.47            |                        | 0.82            |                        | 0.87            |                         | <b>0.02</b>     |
| No                      | Reference             |                 | Reference              |                 | Reference              |                 | Reference               |                 |
| Yes                     | 2.37<br>(-4.11, 8.84) |                 | 0.29<br>(-2.17, 2.74)  |                 | 0.32<br>(-3.4, 4.03)   |                 | -2.72<br>(-5.01, -0.44) |                 |

Total sample size of  $n=89$

**Table S7.** Modified PAHC Tool.

| You have been offered genetic testing because of your diagnosis of cancer. Please answer the following question about your thoughts on genetic testing by placing a box in the appropriate box below <sup>a</sup> : |                     |
|---------------------------------------------------------------------------------------------------------------------------------------------------------------------------------------------------------------------|---------------------|
| Domain & Items                                                                                                                                                                                                      | Cronbach's $\alpha$ |
| <b>Hereditary Predisposition Domain</b>                                                                                                                                                                             | <b>0.88</b>         |
| I am worried about the chance of finding out that I am a carrier of a genetic mutation.                                                                                                                             |                     |
| I am worried about having to make a decision about possible risk reducing options (e.g. preventive surgery or high risk screening).                                                                                 |                     |
| I am worried about how I will cope with my genetic test results.                                                                                                                                                    |                     |
| <b>Practical Issues Domain</b>                                                                                                                                                                                      | <b>0.69</b>         |

|                                                                                                                                                       |             |
|-------------------------------------------------------------------------------------------------------------------------------------------------------|-------------|
| . I am worried about how my genetic test results will impact my daily life (at home, at work, at school, or with hobbies).                            |             |
| I am worried about how my genetic test results will impact my ability to obtain life insurance.                                                       |             |
| <b>Family Problems Domain</b>                                                                                                                         | <b>0.60</b> |
| I feel misunderstood by my family and/or friends regarding my decision to have genetic testing.                                                       |             |
| I am bothered by the lack of support regarding my decision to have genetic testing from my family and/or friends.                                     |             |
| . I am worried about my family's ability to function because of my decision to have genetic testing.                                                  |             |
| I feel genetic testing may benefit my family members. [not scored]                                                                                    |             |
| I am worried about contacting family members about my genetic test results.                                                                           |             |
| I feel burdened by a sense of responsibility towards my family about my decision to have genetic testing.                                             |             |
| <b>Living with Cancer Domain</b>                                                                                                                      | <b>0.76</b> |
| I am burdened by my cancer diagnosis or cancer treatment.                                                                                             |             |
| . I am worried about the chance of getting a <b>new</b> diagnosis of cancer.                                                                          |             |
| . I feel that genetic testing can help me understand why I developed cancer. [not scored]                                                             |             |
| I am worried about the chance that my family members will get cancer.                                                                                 |             |
| <b>General Emotions Domain</b>                                                                                                                        | <b>0.89</b> |
| . I feel anxious.                                                                                                                                     |             |
| I feel insecure about the future.                                                                                                                     |             |
| I have questions about life and death.                                                                                                                |             |
| I feel depressed.                                                                                                                                     |             |
| I feel glad that I am having genetic testing. [not scored]                                                                                            |             |
| <b>Child-Related Issues Domain</b>                                                                                                                    | <b>0.77</b> |
| <i>you have children, please answer the following questions:</i>                                                                                      |             |
| . I feel guilty about the chance of passing on a genetic mutation to my children.                                                                     |             |
| I am worried about telling my children about my genetic test results.                                                                                 |             |
| . I am worried about the chance that my children may develop cancer.                                                                                  |             |
| <hr/>                                                                                                                                                 |             |
| <sup>a</sup> Participants were provided with 'Not at all', 'A Little', 'Quite a Bit' or 'Very Much', which were coded as 1, 2, 3, or 4, respectively. |             |
